# Supplementary material for: Bi-continuous orthorhombic soft matter phase made of polycatenar molecules
Source: Royal Society of Chemistry journal article supplement (doi:10.1039/d0sm00331j), 2020-01-01
Supplement: d0sm00331j1.pdf [file d0sm00331j1.pdf]

## Bi-continuous orthorhombic soft matter phase made of polycatenar molecules

Joanna Matraszek, Damian Pocięcha, Nataša Vaupotič, Mirosław Salamończyk, Martin Vogrin, Ewa Gorecka

### Methods

The products were separated on the column chromatography using silica gel 60 Å (230-400 mesh Fluka). The molecular structure and purity of the synthesized compounds were confirmed by the following analytical methods: analytical thin-layer chromatography (TLC), <sup>1</sup>HNMR, <sup>13</sup>CNMR spectroscopy and elemental analysis. Analytical thin-layer chromatography (TLC) was performed using Silica Gel 60 Å F254 (Merck) and visualized using iodine vapor and/or UV lamp (254 nm and 365 nm). NMR spectra were measured with NMR Bruker AVANCE 300 MHz or Bruker BioSpin GmbH 500 MHz spectrometer using tetramethylsilane as an internal standard. Chemical shifts are reported in ppm. High-resolution mass spectra were performed on Spectrometer Quattro LC (*Triple Quadrupole Mass Spectrometer*) apparatus using the TOF MS ES+ method.

The initial X-ray studies for all materials were performed with the Bruker Nanostar system (CuKα line, three-pinhole beam collimator, Vantec 2000 area detector). Samples were prepared as droplets on a heated surface. For chosen materials, additional X-ray measurements were carried out on the SAXS beam line (7.3.3) at the Advanced Light Source, Lawrence Berkeley National Laboratory at the wavelength 0.12398 nm. Samples were placed on heating plate as droplets. The scattering intensity was recorded using the Pilatus 2M detector. Optical studies were performed by using the Zeiss Axio Imager A2m polarizing microscope equipped with a Linkam heating stage. Samples were observed in glass cells of various thicknesses: from 1.8 to 10 μm. The birefringence was calculated from the optical retardation at green light (λ = 545 nm), measured with a CRI Abrio Imaging System. Knowing the sample thickness, the retardation was recalculated into optical birefringence. Calorimetric studies were performed with a TA DSC Q200 calorimeter, samples of mass from 1 to 3 mg were sealed in aluminum pans and kept in nitrogen atmosphere during measurement, both heating and cooling scans were performed with a rate of 5 – 10 K/min.

### Synthesis

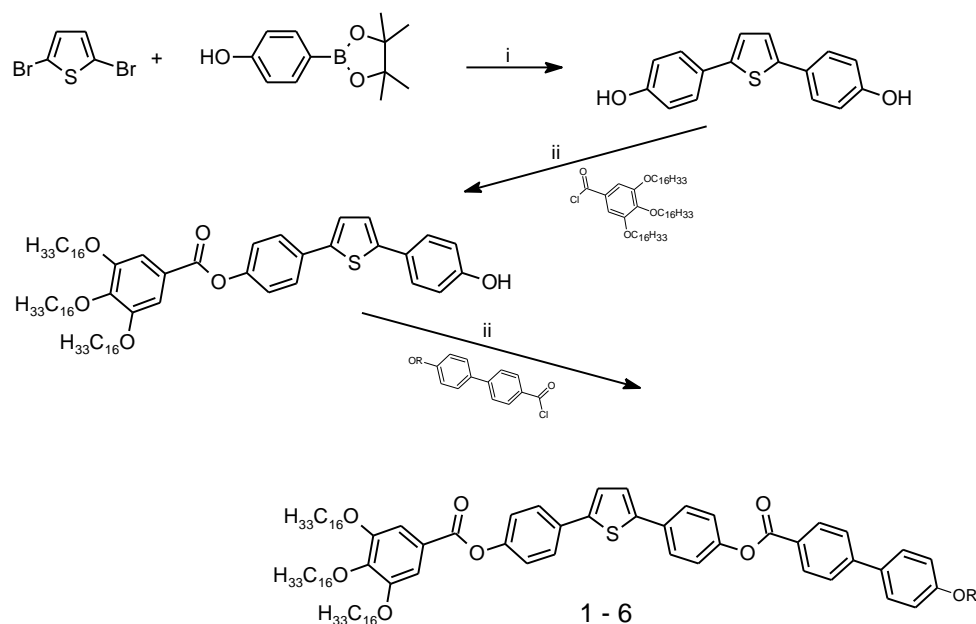

**Scheme S1.** The reaction chain leading to the studied molecules, R stands for the alkyl chain – see the main text. Reagents and conditions: (i) Pd(PPh<sub>3</sub>)<sub>4</sub>, saturated solution of NaHCO<sub>3</sub>, inert gas atmosphere, reflux; (ii) THF, DMAP, TEA, reflux, 5h;

Below, we present the synthesis of a bent mesogenic molecule with  $R = C_4H_9$  (compound 1) as a general method to obtain final compounds 1-6. Other molecules were obtained under similar reaction conditions and the same molar ratio of substrates.  $^1H$ NMR,  $^{13}C$ NMR spectroscopy and elemental analysis of the obtained compounds confirmed the expected structures.

#### General procedure for the synthesis of target materials 1- 6

##### Synthesis of 4,4'-(thiophene-2,5-diyl)diphenol

To a solution of 2,5-dibromothiophene (12.0 g, 50.0 mmol) and 4-hydroxyphenylboronic acid pinacol ester (26.2 g, 119.0 mmol) in THF (150 mL) saturated solution of  $NaHCO_3$  (70 mL) was added all at once. Then the reaction mixture was degassed with argon and palladium catalyst (1.4 g  $Pd(PPh_3)_4$ ) was added. The reaction mixture was stirred and left for 8 h at the boiling point of solvents. After that it was extracted three times with chloroform, the collected organic layers were dried over anhydrous magnesium sulphate and the solvents were removed. The product was separated on column chromatography on silica gel and eluted with mixture of solvents gradually changing concentration of methanol in chloroform from 1% to 5%. Yield 60%.

$^1H$ -NMR (MeOD, 300 MHz):  $\delta$  (ppm) 7.45 (4H, d,  $J=8.7$ Hz), 7.12 (2H, s), 6.80 (4H, d,  $J=8.6$ Hz);

$^{13}C$ -NMR (MeOD, 75 MHz):  $\delta$  (ppm) 158.38, 143.87, 127.84, 127.70, 123.63;

Elemental analysis ( $C_{16}H_{12}O_2S$ ,  $M=268.33$ ) - Calculated: C(71.62%), H(4.51%); Found: C(71.85%), H(4.48%);

##### Synthesis of 4-(5-(4-hydroxyphenyl)thiophen-2-yl)phenyl 3,4,5-tris(hexadecyloxy)benzoate

4,4'-(thiophene-2,5-diyl)diphenol (6.0 g, 20.1 mmol) was dissolved in dry THF (70 mL), DMAP (catalytic amount) and triethylamine (1 mL) was added all at once. Then a solution of 3,4,5-trihexadecyloxybenzoyl chloride (15.6 g, 18.0 mmol) in THF (15 mL) was added dropwise. The reaction mixture was stirred at room temperature over night. The solvent was evaporated and the crude compound was isolated on column chromatography on silica gel using  $CHCl_3$  as eluent. Yield 68%.

$^1H$ -NMR ( $CDCl_3$ , 300 MHz):  $\delta$  (ppm) 7.66 (2H, d,  $J=8.7$ Hz), 7.48 (2H, d,  $J=8.5$ Hz), 7.45 (2H, s), 7.24 – 7.15 (4H, m), 6.81 (2H, d,  $J=8.6$ Hz);

$^{13}C$ -NMR ( $CDCl_3$ , 75 MHz):  $\delta$  (ppm) 165.34, 155.48, 152.97, 150.14, 145.44, 143.86, 143.14, 143.07, 141.45, 132.38, 127.04, 126.54, 124.12, 123.67, 122.89, 122.23, 115.79, 108.59, 73.63, 69.28, 34.53, 31.92, 30.33, 29.71, 29.67, 29.64, 29.57, 29.40, 29.29, 27.99, 26.08, 22.68, 18.38, 14.11;

Elemental analysis ( $C_{71}H_{112}O_6S$ ,  $M=1093.71$ ) - Calculated: C(77.97%), H(10.32%); Found: C(78.08%), H(10.45%);

##### Synthesis of the final compound with $R = C_4H_9$ (1)

This synthesis was performed according to the previously described procedure 2 starting from the monosubstituted derivatives of thiophenediphenol (250 mg, 0.23 mmol) and 4'-butoxy-[1,1'-biphenyl]-4-carbonyl chloride (79 mg, 0.27 mmol). For purification by the column chromatography a mixture of solvents toluene/hexan (4/1, v/v) was used. Yield 93%.

#### Analytical data for target compounds

##### Compound 1 (with $R = C_4H_9$ )

$^1H$ -NMR ( $CDCl_3$ , 500 MHz):  $\delta$  (ppm) 8.25 (2H, d,  $J=8.4$ Hz), 7.72-7.67 (6H, m), 7.60 (2H, d,  $J=8.5$ Hz), 7.42 (2H, s), 7.29 (2H, s), 7.25 – 7.22 (4H, m), 7.01 (2H, d,  $J=8.7$ Hz), 4.08-4.01 (8H, m), 1.89-1.72 (8H, m), 1.57-1.45 (8H, m), 1.47-1.20 (72H, m), 1.00 (3H, t,  $J=7.2$ Hz), 0.90 (9H, t,  $J=6.6$ Hz);

$^{13}C$ -NMR ( $CDCl_3$ , 125 MHz):  $\delta$  (ppm) 165.11, 165.01, 159.65, 153.01, 150.50, 150.48, 146.11, 143.10, 142.93, 142.91, 132.10, 131.96, 130.78, 128.42, 127.36, 126.76, 126.73, 126.64, 124.29, 123.78, 122.33, 122.31, 115.02, 108.61, 115.02, 108.61, 73.62, 69.31, 67.87, 31.97, 31.33, 30.39, 29.80, 29.78, 29.75, 29.72, 29.71, 29.68, 29.62, 29.44, 29.42, 29.41, 29.34, 26.17, 26.10, 22.73, 19.29, 14.16, 13.89;

Elemental analysis ( $C_{88}H_{128}O_8S$ ,  $M=1346.02$ ) - Calculated: C(78.52%), H(9.59%); Found: C(78.65%), H(9.50%);

HRMS (TOF)  $m/z$  for  $C_{88}H_{128}O_8S$  [ $M+Na$ ] $^+$ ; Calculated: 1367.9228; Found 1367.9268;

##### Compound 2 (with $R = C_5H_{11}$ )

$^1H$ -NMR ( $CDCl_3$ , 500 MHz):  $\delta$  (ppm) 8.25 (2H, d,  $J=8.5$ Hz), 7.72-7.67 (6H, m), 7.61 (2H, d,  $J=8.5$ Hz), 7.42 (2H, s), 7.29 (2H, s), 7.24 (4H, m), 7.02 (2H, d,  $J=8.6$ Hz), 4.09-4.00 (8H, m), 1.86-1.74 (8H, m), 1.55-1.40 (8H, m), 1.35-1.24 (74H, m), 0.95 (3H, t,  $J=7.2$ Hz), 0.88 (9H, t,  $J=6.5$ Hz);

$^{13}C$ -NMR ( $CDCl_3$ , 125 MHz):  $\delta$  (ppm) 165.10, 165.00, 159.63, 153.00, 150.47, 146.11, 143.09, 142.92, 142.90, 132.09, 131.95, 130.77, 128.41, 127.35, 126.76, 126.73, 126.63, 124.29, 123.77, 122.32, 122.30, 115.01, 108.60, 73.61, 69.30, 68.17 31.95, 30.37, 29.78, 29.76, 29.74, 29.69, 29.67, 29.60, 29.43, 29.40, 29.39, 29.33, 28.98, 28.22, 26.11, 26.09, 22.71, 22.49, 14.14, 14.05;

Elemental analysis ( $C_{89}H_{130}O_8S$ ,  $M=1360.04$ ) - Calculated: C(78.60%), H(9.63%); Found: C(78.72%), H(9.78%);

HRMS (TOF)  $m/z$  for  $C_{89}H_{130}O_8S$  [ $M+Na$ ] $^+$ ; Calculated: 1381.9384; Found 1381.9399;

##### Compound 3 (with $R = C_6H_{13}$ )

$^1H$ -NMR ( $CDCl_3$ , 500 MHz):  $\delta$  (ppm) 8.24 (2H, d,  $J=8.4$ Hz), 7.71-7.66 (6H, m), 7.58 (2H, d,  $J=8.7$ Hz), 7.42 (2H, s), 7.29-7.22 (6H, m), 6.99 (2H, d,  $J=8.7$ Hz), 4.09-4.00 (8H, m), 1.88-1.72 (8H, m), 1.56-1.45 (8H, m), 1.43-1.22 (76H, m), 0.92 (3H, t,  $J=7.0$ Hz) 0.89-0.86 (12H, m);

$^{13}C$ -NMR ( $CDCl_3$ , 125 MHz):  $\delta$  (ppm) 165.12, 165.01, 159.64, 153.01, 150.48, 146.12, 143.10, 142.91, 132.10, 131.10, 130.78, 128.42, 127.36, 126.77, 126.74, 126.65, 124.29, 123.78, 122.33, 122.31, 115.02, 108.61, 73.62, 69.31, 68.20, 31.96, 31.62, 30.38, 29.79, 29.77, 29.75, 29.71, 29.70, 29.67, 29.61, 29.43, 29.41, 29.40, 29.33, 29.25, 26.12, 26.09, 25.76, 22.72, 22.64, 14.15, 14.04;

**Elemental analysis** (C<sub>90</sub>H<sub>132</sub>O<sub>8</sub>S, M=1374.07) - Calculated: C(78.67%), H(9.68%); Found: C(78.54%), H(9.60%);

**HRMS (TOF)** m/z for C<sub>90</sub>H<sub>132</sub>O<sub>8</sub>S [M+Na]<sup>+</sup>; Calculated: 1395.9541; Found 1395.9518;

*Compound 4 (with R = C<sub>8</sub>H<sub>17</sub>)*

**<sup>1</sup>H-NMR** (CDCl<sub>3</sub>, 300 MHz): δ (ppm) 8.24 (2H, d, J=8.6Hz), 7.72-7.67 (6H, m), 7.60 (2H, d, J=8.6Hz), 7.42 (2H, s), 7.29 (2H, s), 7.25-7.22 (4H, m), **7.00 (2H, d, J=7.9Hz), 4.09-4.00 (8H, m), 1.88-1.72 (8H, m), 1.54-1.44 (8H, m), 1.41-1.24 (80H, m), 0.92-0.86 (12H, m)**;

**<sup>13</sup>C-NMR** (CDCl<sub>3</sub>, 75 MHz): δ (ppm) 165.08, 164.98, 159.61, 152.97, 150.46, 146.09, 143.07, 142.90, 142.88, 132.06, 131.91, 130.75, 128.38, 127.32, 126.73, 126.70, 126.61, 124.26, 123.75, 122.30, 122.27, 114.99, 108.58, 73.58, 69.28, 68.17, 31.93, 30.35, 29.74, 29.71, 29.67, 29.64, 29.58, 29.40, 29.37, 29.34, 29.30, 29.25, 26.09, 22.69, 14.11;

**Elemental analysis** (C<sub>92</sub>H<sub>136</sub>O<sub>8</sub>S, M=1402.12) - Calculated: C(78.81%), H(9.78%); Found: C(78.95%), H(9.84%);

*Compound 5 (with R = C<sub>11</sub>H<sub>23</sub>)*

**<sup>1</sup>H-NMR** (CDCl<sub>3</sub>, 300 MHz): δ (ppm) 8.25 (2H, d, J=8.4Hz), 7.72-7.67 (6H, m), 7.60 (2H, d, J=8.7Hz), 7.42 (2H, s), 7.29 (2H, s), 7.25-7.22 (4H, m), 7.01 (2H, d, J=8.7Hz), 4.09-4.00 (8H, m), 1.88-1.72 (8H, m), 1.55-1.44 (8H, m), 1.41-1.24 (86H, m), 0.92-0.86 (12H, m);

**<sup>13</sup>C-NMR** (CDCl<sub>3</sub>, 75 MHz): δ (ppm) 165.08, 164.98, 159.61, 152.98, 150.46, 146.09, 143.07, 142.88, 132.06, 131.92, 130.75, 128.39, 127.32, 126.73, 126.71, 126.61, 124.26, 123.75, 122.27, 114.99, 108.58, 73.59, 69.28, 68.17, 31.93, 31.82, 30.35, 29.71, 29.67, 29.64, 29.58, 29.71, 29.68, 29.64, 29.58, 29.40, 29.37, 29.30, 29.25, 26.09, 22.69, 14.11;

**Elemental analysis** (C<sub>95</sub>H<sub>142</sub>O<sub>8</sub>S, M=1444.20) - Calculated: C(79.01%), H(9.91%); Found: C(78.90%), H(9.96%);

*Compound 6 (with R = (R) CH(C<sub>2</sub>H<sub>5</sub>)C<sub>5</sub>H<sub>11</sub>)*

**<sup>1</sup>H-NMR** (CDCl<sub>3</sub>, 500 MHz): δ (ppm) 8.24 (2H, d, J=8.4Hz), 7.72-7.67 (6H, m), 7.59 (2H, d, J=8.7Hz), 7.42 (2H, s), 7.29 (2H, s), 7.25-7.22 (4H, m), 6.99 (2H, d, J=8.5Hz), 4.28-4.20 (1H, m), 4.09-4.04 (6H, m), 1.88-1.59 (10H, m), 1.53-1.43 (8H, m), 1.41-1.22 (76H, m), 0.98 (3H, t, J=7.5Hz), 0.94-0.86 (12H, m);

**<sup>13</sup>C-NMR** (CDCl<sub>3</sub>, 125 MHz): δ (ppm) 165.11, 165.00, 159.29, 153.00, 150.49, 146.13, 143.10, 142.93, 142.90, 132.08, 131.75, 130.77, 128.46, 127.30, 126.76, 126.73, 126.60, 124.29, 123.77, 122.32, 122.30, 116.25, 108.60, 79.23, 73.61, 69.30, 33.43, 32.00, 31.94, 30.38, 29.78, 29.77, 29.74, 29.71, 29.70, 29.67, 29.61, 29.43, 29.41, 29.40, 29.33, 26.61, 26.12, 26.09, 25.14, 22.72, 22.64, 14.15, 14.06, 9.61 ;

**Elemental analysis** (C<sub>92</sub>H<sub>136</sub>O<sub>8</sub>S, M=1402.12) - Calculated: C(78.81%), H(9.78%); Found: C(78.75%), H(9.76%);

**HRMS (TOF)** m/z for C<sub>92</sub>H<sub>136</sub>O<sub>8</sub>S [M+Na]<sup>+</sup>; Calculated: 1423.98541; Found 1423.9829;

## Additional figures and tables

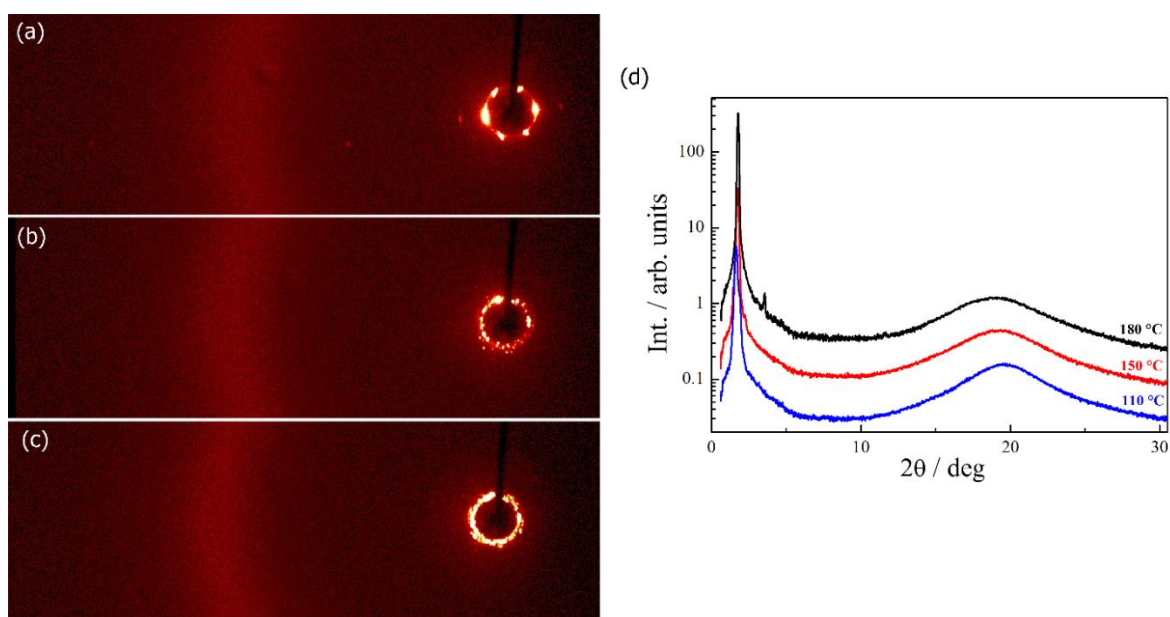

**Figure S1.** Wide angle 2D X-ray diffraction patterns taken for compound with  $n = 6$  in (a)  $\text{Col}_h$  phase at  $T = 180$  °C, (b)  $\text{Ia}\bar{3}d$  at  $T = 150$  °C and (c)  $\text{Pcab}$  phase at  $T = 110$  °C. In all cases diffused signal at high diffraction angle range confirms liquid crystalline character of the phase. (d) 1D XRD patterns obtained by integration of 2D patterns over azimuthal angle. The curves were vertically shifted for clarity of presentation.

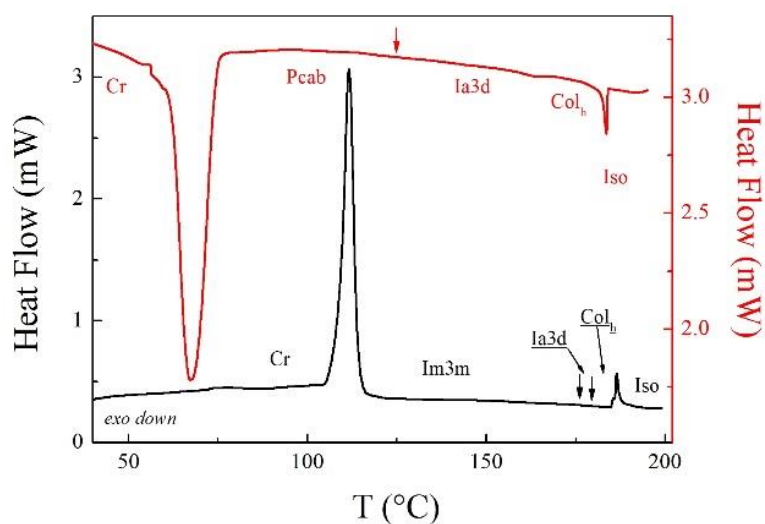

**Figure S2.** DSC thermograms for heating (black) and cooling (red) scans for compound with  $n = 6$ . Arrows mark temperatures of a phase transition detected by the X-ray diffraction studies.

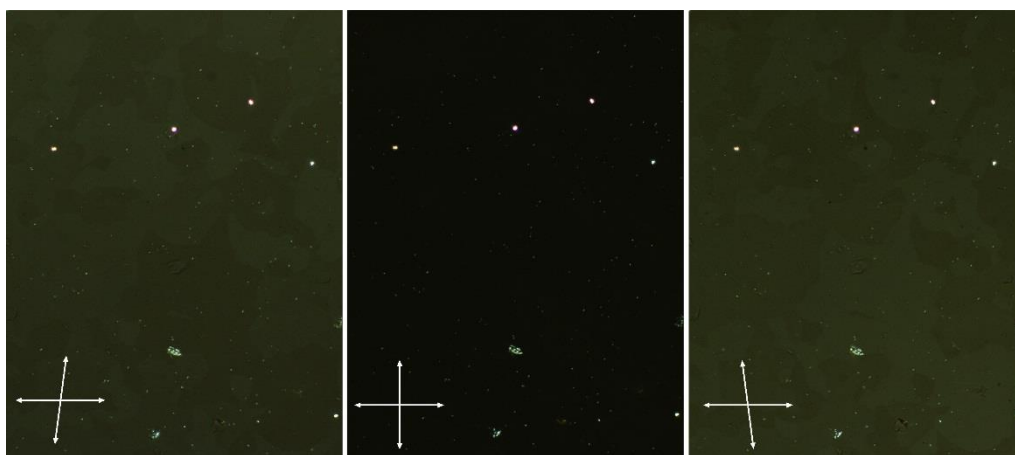

**Figure S3.** Optically isotropic texture of the cubic  $Im\bar{3}m$  phase of compound with  $R = C_6H_{13}$ ; domains showing optical activity are visible under slightly de-crossed polarizers.

**Table S1.** Positions ( $q_{exp}$  and  $d_{exp}$ ) and relative intensities ( $I$ ) of XRD signals recorded in the  $Pcab$  phase, their Miller indices ( $hkl$ ) and calculated positions ( $q_{calc}$  and  $d_{calc}$ ).

| $q_{exp} / \text{\AA}^{-1}$ | $d_{exp} / \text{\AA}$ | $I$   | ( $hkl$ ) | $q_{calc} / \text{\AA}^{-1}$ | $d_{calc} / \text{\AA}$ |
|-----------------------------|------------------------|-------|-----------|------------------------------|-------------------------|
| 0.09159                     | 68.60                  | 0.03  | (002)     | 0.09121                      | 68.89                   |
| 0.09313                     | 67.47                  | 0.19  | (200)     | 0.09326                      | 67.37                   |
| 0.1043                      | 60.23                  | 1.22  | (012)     | 0.1041                       | 60.38                   |
| 0.1106                      | 56.82                  | 13.27 | (120)     | 0.1105                       | 56.84                   |
| 0.1141                      | 55.08                  | 87.73 | (112)     | 0.1140                       | 55.10                   |
| 0.1153                      | 54.48                  | 100   | (211)     | 0.1153                       | 54.51                   |
| 0.1197                      | 52.51                  | 69.71 | (121)     | 0.1196                       | 52.55                   |
| 0.1304                      | 48.18                  | 18.52 | (202)     | 0.1305                       | 48.16                   |
| 0.1356                      | 46.34                  | 7.03  | (022)     | 0.1355                       | 46.37                   |
| 0.1368                      | 45.92                  | 8.89  | (220)     | 0.1369                       | 45.90                   |
| 0.1398                      | 44.95                  | 1.06  | (212)     | 0.1398                       | 44.96                   |
| 0.1437                      | 43.72                  | 1.90  | (122)     | 0.1433                       | 43.84                   |
|                             |                        |       | (221)     | 0.1443                       | 43.54                   |
| 0.1534                      | 40.97                  | 1.32  | (113)     | 0.1530                       | 41.07                   |
| 0.1553                      | 40.45                  | 0.17  | (311)     | 0.1554                       | 40.42                   |
| 0.1644                      | 38.23                  | 0.16  | (131)     | 0.1639                       | 38.34                   |
|                             |                        |       | (222)     | 0.1645                       | 38.20                   |
| 0.1659                      | 37.88                  | 0.17  | (203)     | 0.1656                       | 37.95                   |
| 0.1725                      | 36.42                  | 0.02  | (320)     | 0.1721                       | 36.51                   |
|                             |                        |       | (213)     | 0.1730                       | 36.32                   |
| 0.1762                      | 35.68                  | 0.16  | (032)     | 0.1758                       | 35.73                   |
|                             |                        |       | (123)     | 0.1759                       | 35.72                   |
| 0.1827                      | 34.41                  | 0.34  | (004)     | 0.1824                       | 34.44                   |
|                             |                        |       | (231)     | 0.1827                       | 34.39                   |
| 0.1935                      | 32.47                  | 0.30  | (223)     | 0.1936                       | 32.46                   |
| 0.1952                      | 32.19                  | 0.06  | (322)     | 0.1948                       | 32.26                   |
|                             |                        |       | (114)     | 0.1948                       | 32.25                   |
| 0.2010                      | 31.26                  | 0.37  | (040)     | 0.2005                       | 31.34                   |
|                             |                        |       | (313)     | 0.2020                       | 31.11                   |
|                             |                        |       | (331)     | 0.2104                       | 29.87                   |
| 0.2109                      | 29.82                  | 0.16  | (141)     | 0.2108                       | 29.81                   |
|                             |                        |       | (214)     | 0.2109                       | 29.79                   |
|                             |                        |       | (420)     | 0.2118                       | 29.67                   |
| 0.2197                      | 28.57                  | 0.10  | (323)     | 0.2198                       | 28.58                   |
| 0.2211                      | 28.42                  | 0.15  | (240)     | 0.2211                       | 28.42                   |
| 0.2294                      | 27.38                  | 0.13  | (224)     | 0.2281                       | 27.55                   |
|                             |                        |       | (422)     | 0.2306                       | 27.25                   |
| 0.2447                      | 25.67                  | 0.03  | (340)     | 0.2444                       | 25.71                   |
| 0.2486                      | 25.27                  | 0.11  | (341)     | 0.2486                       | 25.27                   |

**Table S2.** Positions ( $q_{exp}$  and  $d_{exp}$ ) and relative intensities ( $I$ ) of XRD signals recorded in the  $Ia\bar{3}d$  phase, their Miller indices ( $hkl$ ) and calculated positions ( $q_{calc}$  and  $d_{calc}$ ).

| $q_{exp} / \text{\AA}^{-1}$ | $d_{exp} / \text{\AA}$ | $I$   | ( $hkl$ )    | $q_{calc} / \text{\AA}^{-1}$ | $d_{calc} / \text{\AA}$ |
|-----------------------------|------------------------|-------|--------------|------------------------------|-------------------------|
| 0.1206                      | 52.10                  | 100   | (211)        | 0.1206                       | 52.11                   |
| 0.1391                      | 45.18                  | 13.70 | (022)        | 0.1392                       | 45.13                   |
| 0.1841                      | 34.13                  | 0.10  | (321)        | 0.1842                       | 34.11                   |
| 0.1968                      | 31.93                  | 0.32  | (004)        | 0.1969                       | 31.91                   |
| 0.2204                      | 28.50                  | 0.31  | (042)        | 0.2201                       | 28.54                   |
| 0.2411                      | 26.06                  | 0.12  | (422)        | 0.2412                       | 26.05                   |
| 0.2507                      | 25.06                  | 0.20  | (431)        | 0.2510                       | 25.03                   |
| 0.2784                      | 22.57                  | 0.02  | (044)        | 0.2785                       | 22.56                   |
| 0.3037                      | 20.69                  | 0.08  | (532), (611) | 0.3034                       | 20.70                   |
| 0.3476                      | 18.08                  | 0.08  | (543)        | 0.3481                       | 18.05                   |

**Table S3.** Positions ( $q_{exp}$  and  $d_{exp}$ ) and relative intensities ( $I$ ) of XRD signals recorded in  $Im\bar{3}m$  phase, their Miller indices ( $hkl$ ) and calculated positions ( $q_{calc}$  and  $d_{calc}$ ).

| $q_{exp} / \text{\AA}^{-1}$ | $d_{exp} / \text{\AA}$ | $I$   | ( $hkl$ )              | $q_{calc} / \text{\AA}^{-1}$ | $d_{calc} / \text{\AA}$ |
|-----------------------------|------------------------|-------|------------------------|------------------------------|-------------------------|
| 0.04421                     | 142.11                 | 0.01  | (011)                  | 0.04409                      | 142.52                  |
| 0.07636                     | 82.28                  | 0.17  | (211)                  | 0.07636                      | 82.28                   |
| 0.08833                     | 71.13                  | 0.10  | (022)                  | 0.08817                      | 71.26                   |
| 0.09863                     | 63.70                  | 0.85  | (031)                  | 0.09858                      | 63.74                   |
| 0.1080                      | 58.15                  | 2.56  | (222)                  | 0.1080                       | 58.18                   |
| 0.1166                      | 53.86                  | 100   | (321)                  | 0.1166                       | 53.87                   |
| 0.1247                      | 50.39                  | 25.71 | (004)                  | 0.1247                       | 50.39                   |
| 0.1323                      | 47.51                  | 2.98  | (033)                  | 0.1322                       | 47.51                   |
| 0.1394                      | 45.08                  | 6.76  | (042)                  | 0.1394                       | 45.07                   |
| 0.1527                      | 41.15                  | 0.52  | (422)                  | 0.1527                       | 41.14                   |
| 0.1589                      | 39.54                  | 1.26  | (051), (431)           | 0.1590                       | 39.53                   |
| 0.1707                      | 36.81                  | 0.12  | (521)                  | 0.1707                       | 36.80                   |
| 0.1762                      | 35.67                  | 0.02  | (044)                  | 0.1764                       | 35.63                   |
| 0.1817                      | 34.58                  | 0.22  | (433), (053)           | 0.1818                       | 34.57                   |
| 0.1870                      | 33.61                  | 0.07  | (006), (442)           | 0.1871                       | 33.59                   |
| 0.1921                      | 32.71                  | 0.21  | (532), (611)           | 0.1922                       | 32.70                   |
| 0.1970                      | 31.89                  | 0.01  | (062)                  | 0.1972                       | 31.87                   |
| 0.2019                      | 31.12                  | 0.08  | (541)                  | 0.2020                       | 31.10                   |
| 0.2112                      | 29.75                  | 0.05  | (631)                  | 0.2114                       | 29.72                   |
| 0.2159                      | 29.10                  | 0.02  | (444)                  | 0.2160                       | 29.09                   |
| 0.2250                      | 27.93                  | 0.03  | (064)                  | 0.2248                       | 27.95                   |
| 0.2289                      | 27.45                  | 0.06  | (552), (633),<br>(721) | 0.2291                       | 27.43                   |
| 0.2330                      | 26.97                  | 0.01  | (642)                  | 0.2333                       | 26.93                   |
| 0.2453                      | 25.61                  | 0.02  | (732), (651)           | 0.2454                       | 25.60                   |
| 0.2531                      | 24.82                  | 0.02  | (811), (741),<br>(554) | 0.2532                       | 24.81                   |
| 0.2680                      | 23.45                  | 0.03  | (075), (831),<br>(743) | 0.2682                       | 23.43                   |

**Table S4.** Experimentally obtained intensities (in arbitrary units) for the X-ray peaks with Miller indices ( $h, k, l$ ) for the  $Ia\bar{3}d$  ( $I_{Ia3d}$ ) and  $Pcab$  ( $I_{Pcab}$ ) phases, multiplicity of the peaks ( $M_{Ia3d}$  and  $M_{Pcab}$ ), their relative amplitudes ( $F_{Ia3d}$  and  $F_{Pcab}$ ), 1 being assigned to the highest amplitude, and the phases ( $\phi$ ) of the peaks in the  $Ia\bar{3}d$  phase. The data for the  $Pcab$  phase is given at two temperatures, 113 °C and 93 °C, denoted by (1) and (2), respectively. The unit cell dimensions are  $13.47 \times 12.54 \times 13.78 \text{ nm}^3$  in case (1) and  $13.90 \times 12.59 \times 14.11 \text{ nm}^3$  in case (2). In the  $Ia\bar{3}d$  phase, the unit cell length is 12.76 nm.

| ( $h, k, l$ ) | $M_{Ia3d}$ | $I_{Ia3d}[\text{au}]$ | $\phi$ | $F_{Ia3d}$ | $M_{Pcab}$ | $I_{Pcab}^{(1)}$ | $F_{Pcab}^{(1)}$ | $I_{Pcab}^{(2)}$ | $F_{Pcab}^{(2)}$ |
|---------------|------------|-----------------------|--------|------------|------------|------------------|------------------|------------------|------------------|
| (1,2,0)       | /          | /                     | /      | /          | 4          | 3.0              | 0.50             | 2.9              | 0.48             |
| (1,1,2)       |            |                       |        |            | 8          | 18.2             | 0.87             | 19.7             | 0.89             |
| (2,1,1)       | 24         | 10.2                  | $\pi$  | 1          | 8          | 24.3             | 1                | 25.1             | 1                |
| (1,2,1)       |            |                       |        |            | 8          | 16.6             | 0.83             | 17.8             | 0.84             |
| (2,0,2)       |            |                       |        |            | 4          | 4.0              | 0.57             | 5.6              | 0.67             |
| (0,2,2)       | 12         | 1.15                  | $\pi$  | 0.48       | 4          | 1.5              | 0.35             | 2.5              | 0.45             |
| (2,2,0)       |            |                       |        |            | 4          | 1.8              | 0.39             | 1.7              | 0.37             |
| (3,2,1)       | 48         | 0.01                  | 0      | 0.02       | /          | /                | /                | /                | /                |
| (0,0,4)       | 6          | 0.04                  | $\pi$  | 0.12       | /          | /                | /                | /                | /                |
